# Supplementary material for: First Trimester of Pregnancy as the Sensitive Period for the Association between Prenatal Mosquito Coil Smoke Exposure and Preterm Birth
Source: MDPI journal article supplement (doi:10.3390/ijerph191811771), 2022-09-18
Supplement: s1 [file s1]

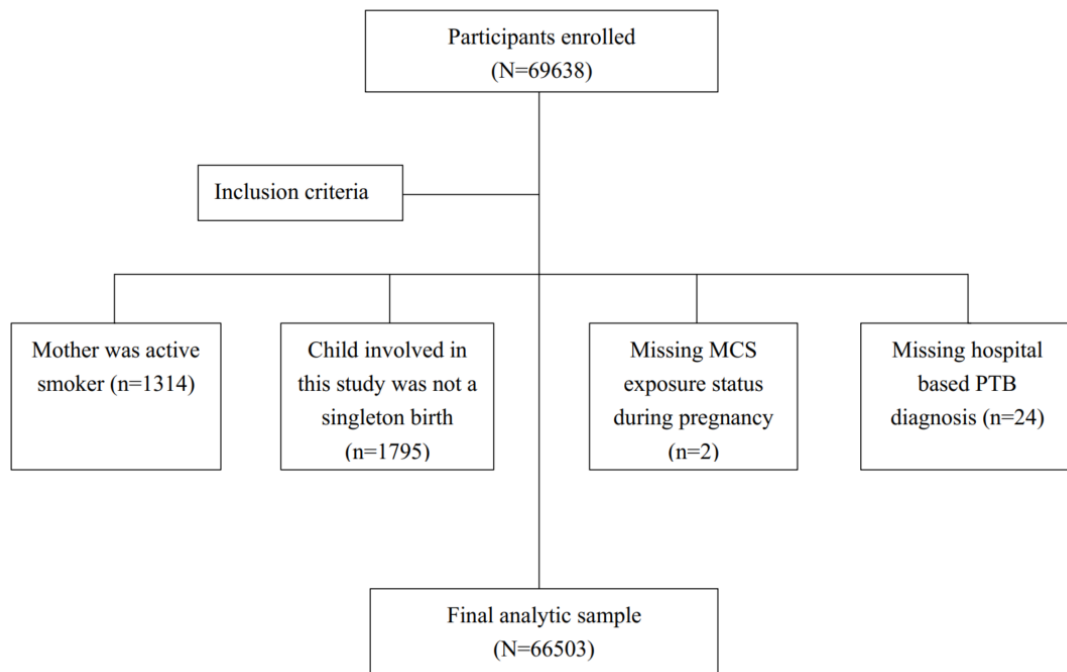

**Figure S1.** Flow chart of the analytic sample selection process.

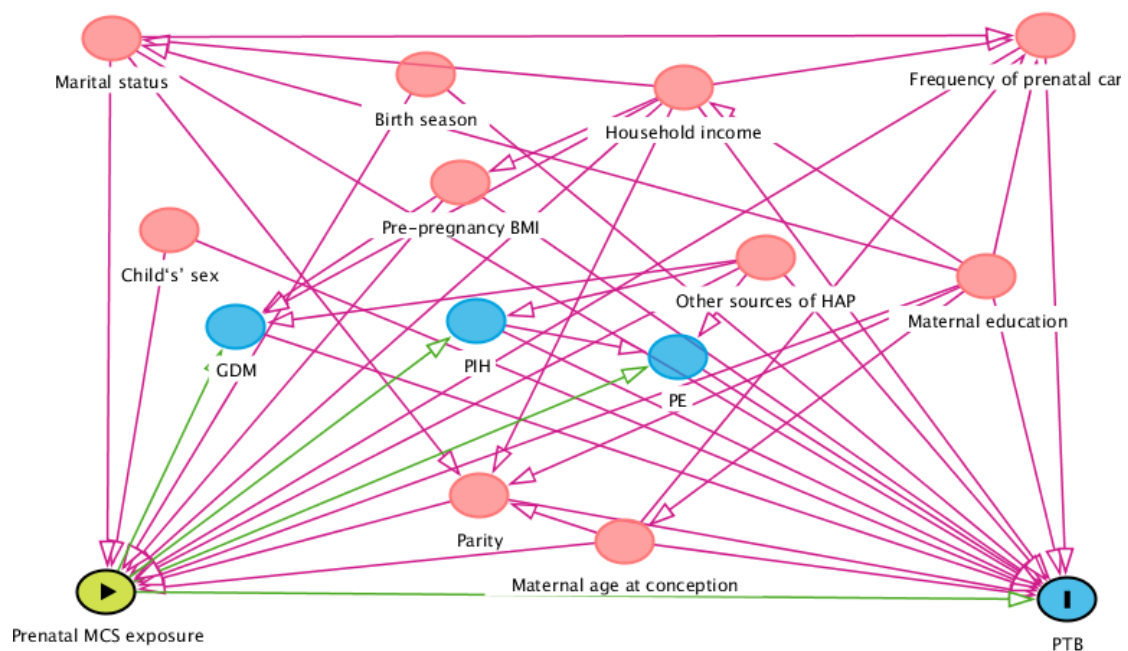

**Figure S2.** Directed acyclic graph (DAG) for the association between prenatal MCS exposure and PTB, showing all potential confounders. Pink lines indicate potential confounders.

MCS: mosquito coil smoke; PTB: preterm birth; BMI: body mass index; GDM: gestational diabetes mellitus; PIH: pregnancy induced hypertension; PE: Pre-eclampsia

**Table S1.** Cross-over analysis for association between prenatal MCS exposure and PTB.

| MCS exposure        |                      |                     | PTB/n      | ORs (95% CI)      |                       |
|---------------------|----------------------|---------------------|------------|-------------------|-----------------------|
| The first trimester | The second trimester | The third trimester |            | Crude             | Adjusted <sup>a</sup> |
| No                  | No                   | No                  | 3186/46167 | 1.00              | 1.00                  |
| <b>Yes</b>          | No                   | No                  | 210/2411   | 1.29 (1.11, 1.49) | 1.27 (1.09, 1.46)     |
| No                  | <b>Yes</b>           | No                  | 34/549     | 0.89 (0.62, 1.24) | 0.86 (0.60, 1.20)     |
| No                  | No                   | <b>Yes</b>          | 47/781     | 0.86 (0.63, 1.15) | 0.86 (0.63, 1.14)     |
| <b>Yes</b>          | <b>Yes</b>           | No                  | 118/1375   | 1.27 (1.04, 1.53) | 1.23 (1.01, 1.48)     |
| <b>Yes</b>          | No                   | <b>Yes</b>          | 18/282     | 0.92 (0.55, 1.44) | 0.90 (0.53, 1.40)     |
| No                  | <b>Yes</b>           | <b>Yes</b>          | 73/1146    | 0.92 (0.72, 1.16) | 0.90 (0.70, 1.13)     |
| <b>Yes</b>          | <b>Yes</b>           | <b>Yes</b>          | 1101/13792 | 1.17 (1.09, 1.26) | 1.14 (1.06, 1.23)     |

<sup>a</sup> Adjustment for maternal age at conception, maternal education, marital status, household income, frequency of prenatal care visits, pre-pregnancy BMI, parity, child's sex, birth season, and exposure to other four sources of household air pollution.

Abbreviations: MCS, mosquito coil smoke; PTB, preterm birth

**Table S2.** Cross-over analysis for association between prenatal MCS exposure and PTB, stratified by the child's sex <sup>#</sup>.

| MCS exposure        |                      |                     | aORs (95% CI)     |                   |
|---------------------|----------------------|---------------------|-------------------|-------------------|
| The first trimester | The second trimester | The third trimester | Boys              | Girls             |
| No                  | No                   | No                  | 1.00              | 1.00              |
| <b>Yes</b>          | No                   | No                  | 1.21 (0.99, 1.47) | 1.34 (1.07, 1.66) |
| No                  | <b>Yes</b>           | No                  | 0.91 (0.57, 1.38) | 0.78 (0.41, 1.33) |
| No                  | No                   | <b>Yes</b>          | 0.88 (0.58, 1.27) | 0.83 (0.50, 1.29) |
| <b>Yes</b>          | <b>Yes</b>           | No                  | 1.21 (0.93, 1.55) | 1.24 (1.01, 1.49) |
| <b>Yes</b>          | No                   | <b>Yes</b>          | 1.01 (0.53, 1.75) | 0.73 (0.29, 1.53) |
| No                  | <b>Yes</b>           | <b>Yes</b>          | 0.85 (0.61, 1.16) | 0.96 (0.65, 1.35) |
| <b>Yes</b>          | <b>Yes</b>           | <b>Yes</b>          | 1.04 (0.94, 1.15) | 1.27 (1.14, 1.42) |

<sup>#</sup> Adjustment for maternal age at conception, maternal education, marital status, household income, frequency of prenatal care visits, pre-pregnancy BMI, parity, child's sex, birth season, and exposure to other four sources of household air pollution.

Abbreviations: MCS, mosquito coil smoke; PTB, preterm birth.

**Table S3.** Associations between maternal MCS exposure during different periods of pregnancy and PTB (n = 61226).

| Exposure periods    | MCS exposure | PTB/n      | OR (95% CI)       |                       |
|---------------------|--------------|------------|-------------------|-----------------------|
|                     |              |            | Crude             | Adjusted <sup>a</sup> |
| Entire pregnancy    | No           | 2914/42599 | 1.00              | 1.00                  |
|                     | Yes          | 1429/18627 | 1.13 (1.06, 1.21) | 1.11 (1.03, 1.18)     |
| The first trimester | No           | 3053/44884 | 1.00              | 1.00                  |

|                      |     |            |                   |                   |
|----------------------|-----|------------|-------------------|-------------------|
|                      | Yes | 1290/16342 | 1.17 (1.10, 1.26) | 1.15 (1.07, 1.23) |
| The second trimester | No  | 3161/45801 | 1.00              | 1.00              |
|                      | Yes | 1182/15425 | 1.12 (1.04, 1.20) | 1.09 (1.01, 1.17) |
| The third trimester  | No  | 3240/46599 | 1.00              | 1.00              |
|                      | Yes | 1103/14627 | 1.09 (1.02, 1.17) | 1.06 (0.99, 1.15) |

<sup>a</sup> Adjustment for maternal age at conception, maternal education, marital status, household income, frequency of prenatal care visits, pre-pregnancy BMI, parity, child's sex, birth season, and exposure to other four sources of household air pollution.

Abbreviations: MCS, mosquito coil smoke; PTB, preterm birth.

**Table S4.** Trimester-specific association between prenatal MCS exposure and PTB (n = 61226).

| MCS exposure        |                      |                     | PTB/n      | OR (95% CI)       |                       |
|---------------------|----------------------|---------------------|------------|-------------------|-----------------------|
| The first trimester | The second trimester | The third trimester |            | Crude             | Adjusted <sup>a</sup> |
| No                  | No                   | No                  | 2914/42599 | 1.00              | 1.00                  |
| <b>Yes</b>          | No                   | No                  | 185/2218   | 1.24 (1.06, 1.44) | 1.22 (1.04, 1.42)     |
| No                  | <b>Yes</b>           | No                  | 31/507     | 0.89 (0.60, 1.26) | 0.86 (0.59, 1.22)     |
| No                  | No                   | <b>Yes</b>          | 45/732     | 0.89 (0.65, 1.19) | 0.89 (0.64, 1.19)     |
| <b>Yes</b>          | <b>Yes</b>           | No                  | 110/1275   | 1.29 (1.05, 1.56) | 1.24 (1.01, 1.51)     |
| <b>Yes</b>          | No                   | <b>Yes</b>          | 17/252     | 0.99 (0.58, 1.56) | 0.97 (0.57, 1.54)     |
| No                  | <b>Yes</b>           | <b>Yes</b>          | 63/1046    | 0.87 (0.67, 1.12) | 0.86 (0.65, 1.10)     |
| <b>Yes</b>          | <b>Yes</b>           | <b>Yes</b>          | 978/12597  | 1.15 (1.06, 1.24) | 1.12 (1.03, 1.21)     |

<sup>a</sup> Adjustment for maternal age at conception, maternal education, marital status, household income, frequency of prenatal care visits, pre-pregnancy BMI, parity, child's sex, birth season, and exposure to other four sources of household air pollution.

Abbreviations: MCS, mosquito coil smoke; PTB, preterm birth.
